# Supplementary material
Source: Springer Nature journal article supplement (http://www.springermedizin.de/resource/supplementary/12887_2010_432_MOESM2_ESM.pdf/9475136)

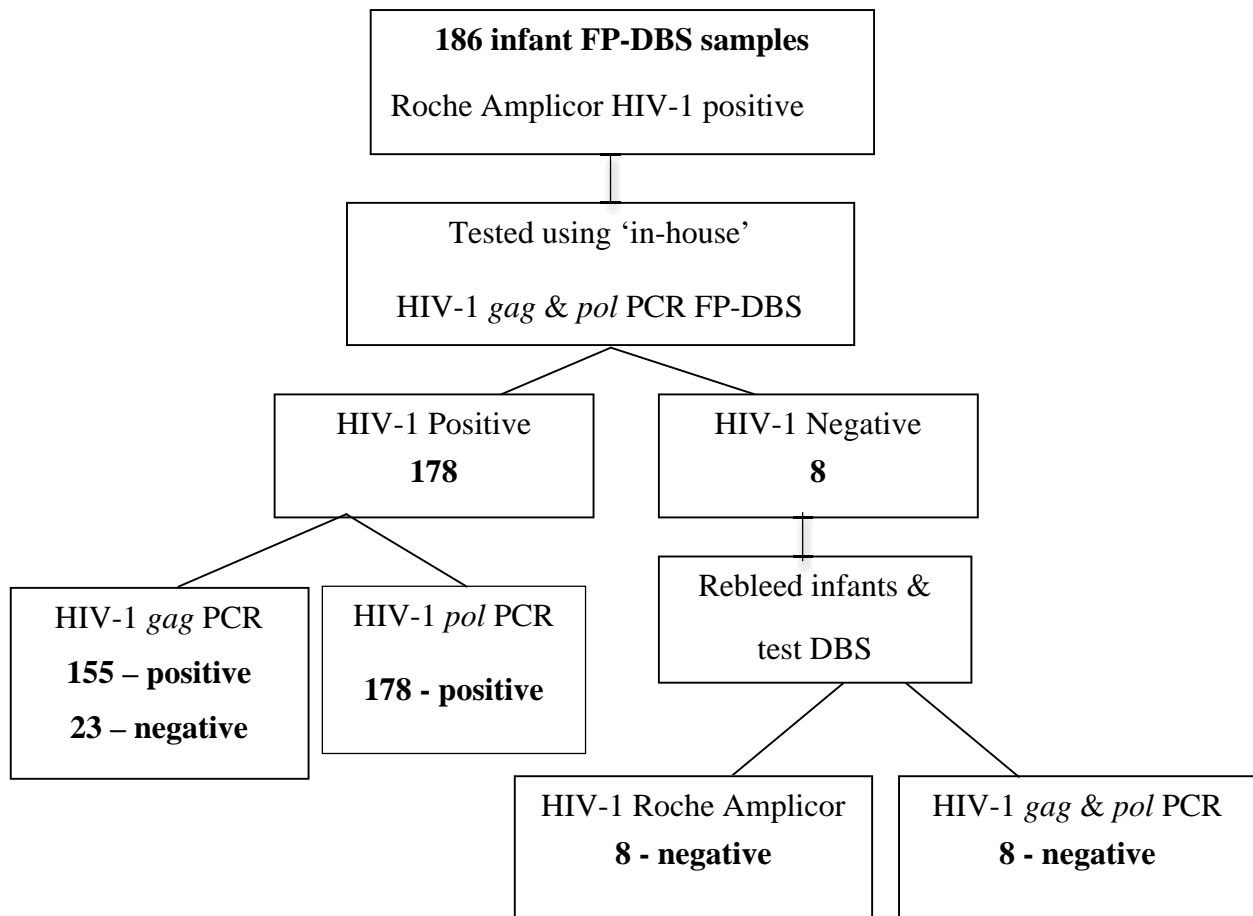

Supplement: MOESM2 [file 9475136]
